# Supplementary material
Source: HighWire-hosted journal article supplement (https://rc.rcjournal.com/highwire/filestream/20608/field_highwire_adjunct_files/0/suppl_1.docx)
Supplement: suppl_1.docx [file suppl_1.docx]

Table S1: Summary of High Flow Nasal Cannula Utilization in Published Randomized Controlled Trials

|  | **Reference** | **Country** | **Location** | **No.** | **Control** | **Device** | **Initial flow** | **Flow adjust** | **actual flow rate** | **Actual FiO2** | **Target SpO2** |
| --- | --- | --- | --- | --- | --- | --- | --- | --- | --- | --- | --- |
| HFNC use for acute hypoxemia to avoid intubation | 2017, Makdee1 | Thailand | ED | 136 | COT | Optiflow/ Airvo | 35 | 60 | NM | .50 | >95% |
| 2017, Delorme2 | Canada | NM | 12 | COT | Airvo2 | NM | 20/40/60 | NM | .46/.40/ .40 | 90%/94% |
| 2016, Jones3 | NZ | ED | 303 | COT | Optiflow/ Airvo | 40 | NM | NM | .28 | >93% |
| 2015, Rittayamai4 | Thailand | ED | 40 | COT | Optiflow | NM | 35 | 35.5 | .45 | >94% |
| 2015, Frat5 | France | ICU | 310 | COT/NIV | Optiflow | NM | 50 | 48 | .82 | >92% |
| 2012, Cuquemelle6 | France | IMCU | 30 | COT | Optiflow | NM | depend on SpO2 | NM | NM | >95% |
| Post-extubation | 2019, Thille7 | France | ICU | 641 | HFNC+NIV | NM | 50 | 50 | 50 | 0.41 | ≥ 92% |
| 2019, Gaspari8 | Italy | ICU | 58 | COT | Servo U | NM | 50 | 50 | NM | ≥ 93% |
| 2018, Di mussi9 | Italy | ICU | 28 | Face mask | Airvo | 20 | 20-60 | NM | .46 | 88-92% |
| 2017, Song10 | China | ICU | 46 | Venturi mask | Airvo2 | 60 | decrease 5-10 | 36.8 | NM | 94–98% |
| 2016, Hernandez11 | Spain | ICU | 604 | NIV | Optiflow | 10 | increase by 5 | 50 | .35 | >92% |
| 2016, Hernandez12 | Spain | ICU | 527 | COT | Optiflow | 10 | increase by 5 | 30.9 | .32 | >92% |
| 2014, Maggiore13 | Italy | ICU | 105 | Venturi mask | Optiflow | NM | 50 | NM | .38 ± .07 | 92-98% |
| 2014, Rittayamai14 | Thailand | ICU | 17 | COT | Optiflow | NM | 35 | NM | NM | 94% |
| Prophylactic use of HFNC for post-surgical patients | 2020, Vourc’h15 | France | ICU | 90 | COT | Optiflow | 45 | 45 | NM | 1.0 | NM |
| 2020, Tatsuishi16 | Japan | ICU | 148 | COT | NM | 45 | 45-60 | NM | 0.21-0.35 | >90% |
| 2019, Pennisi17 | Italy | ICU | 95 | Venturi mask | Airvo | 50 | 50 | 50 | 0.39 | 92-98% |
| 2018, Sahin18 | Turkey | ICU | 100 | Simple mask | Optiflow/ Vapotherm | 25-40 | NM | NM | NM | >93% |
| 2018, Zochios19 | UK | ICU | 100 | COT | NM | 30 | 20-50 | NM | NM | ≥ 93% |
| 2017, Brainard20 | USA | ICU | 44 | COT | Optiflow | 40 | NM | NM | NM | ≥ 90% |
| 2017, Yu21 | China | ICU | 110 | COT | Optiflow | NM | 35-60 | NM | NM | >95% |
| 2016, Futier22 | France | NM | 220 | COT | Optiflow | NM | 50-60 | NM | NM | >95% |
| 2016,Ansari23 | UK | Post OR | 68 | COT | Optiflow | 50 | 20-50 | NM | NM | >93% |
| 2015, Corley24 | Australia | ICU | 155 | COT | Optiflow | 35 | Maximum of 50 | NM | NM | ≥ 95% |
| 2013, Parke25 | Australia | ICU | 340 | COT | Optiflow | NM | 45 | NM | NM | >93% |
| HFNC use to assist intubation | 2019, Guitton26 | France | ICU | 184 | COT | Airvo | 60 | 60 | 60 | 1.0 | NM |
| 2019, Vourc’h27 | France | OR | 100 | NIV | Optiflow | 60 | 60 | NM | 1.0 | NM |
| 2019, Frat28 | France | ICU | 313 | NIV | NM | 60 | NM | 60 | 1.0 | NM |
| 2016, Simon29 | Germany | ICU | 40 | COT | Resuscitator | 50 | NM | 50 | 1.0 | NM |
| 2016, Jaber30 | France | ICU | 49 | NIV | Optiflow | NM | 60 | NM | NM | NM |
| 2015, Vourc’h31 | France | ICU | 119 | COT | Optiflow | 60 | NM | 60 | 1.0 | NM |
| HFNC use during bronchoscopy | 2019, Saksitthichok32 | Thailand | IMCU | 51 | NIV | Airvo | NM | 40 | 40 | 0.6 | NM |
| 2018, Douglas33 | Australia | Bronch | 60 | COT | Optiflow | 30 | 30-70 | 50 | 1.0 | NM |
| 2014, Simon34 | Germany | ICU | 40 | NIV | Optiflow | NM | 50 | NM | NM | >90% |
| Stable COPD | 2019, Braunlich35 | Germany | Unit | 94 | NIV | TNI 20 oxy | 20 | 20 | 20 | 0.29 | NM |
| 2018, Mckinstry36 | NZ | Lab | 48 | Room air | Airvo2 | NM | 15-30-45 | 15-30-45 | 0.21 | NM |
| 2018, Storgaard37 | Denmark | Home | 200 | COT | Airvo or  Optiflow | 15 | 20 | NM | NM | NM |
| 2016, Fraser38 | Australia | NM | 30 | COT | Airvo | NM | 30 | NM | NM | NM |
| COPD post-extubation | 2020, Tan39 | China | ICU | 96 | NIV | Airvo2 | 50 | NM | NM | 0.32 | 88-92% |
| 2019, Jing40 | China | ICU | 42 | NIV | Optiflow or Airvo2 | 50 | NM | 52 | 0.4 | 88-92% |
| COPD exacerbation | 2020, Li41 | China | General wards | 320 | COT | Airvo2 | NM | 27 | 38 | 0.25 | 90-93% |
| 2019, Longhini42 | Italy | ICU | 30 | COT | Optiflow | NM | 50 | 50 | NM | 90-94% |
| 2019, Mckinstry43 | NZ | Lab | 24 | NIV | Airvo2 | NM | 45 | 45 | NM | 88-92% |
| 2019, Sun44 | China | ICU | 72 | NIV | Optiflow | NM | NM | 50 | 0.3 | NM |
| 2018, Lee45 | Korea | Unit | 88 | NIV | Optiflow | 35 | 45-60 | NM | NM | 92% |

FIO2, fraction of inspired oxygen; SpO2, spirometry of pulse oximetry; ICU, intensive care unit; ED, emergency department; OR, operating room; COPD, chronic obstructive pulmonary disease; COT, conventional oxygen therapy; HFNC, high-flow nasal cannula; NIV, noninvasive ventilation; NM, not mentioned; IMCU, intermediate care unit; UK, United Kingdom; NZ, New Zealand.

References for tables:

1. Makdee O, Monsomboon A, Surabenjawong U, et al. High-Flow Nasal Cannula Versus Conventional Oxygen Therapy in Emergency Department Patients With Cardiogenic Pulmonary Edema: A Randomized Controlled Trial. *Ann Emerg Med.* 2017;70(4):465-472 e462.

2. Delorme M, Bouchard PA, Simon M, Simard S, Lellouche F. Effects of High-Flow Nasal Cannula on the Work of Breathing in Patients Recovering From Acute Respiratory Failure. *Crit Care Med.* 2017;45(12):1981-1988.

3. Jones PG, Kamona S, Doran O, Sawtell F, Wilsher M. Randomized Controlled Trial of Humidified High-Flow Nasal Oxygen for Acute Respiratory Distress in the Emergency Department: The HOT-ER Study. *Respir Care.* 2016;61(3):291-299.

4. Rittayamai N, Tscheikuna J, Praphruetkit N, Kijpinyochai S. Use of High-Flow Nasal Cannula for Acute Dyspnea and Hypoxemia in the Emergency Department. *Respir Care.* 2015;60(10):1377-1382.

5. Frat JP, Thille AW, Mercat A, et al. High-flow oxygen through nasal cannula in acute hypoxemic respiratory failure. *N Engl J Med.* 2015;372(23):2185-2196.

6. Cuquemelle E, Pham T, Papon JF, Louis B, Danin PE, Brochard L. Heated and humidified high-flow oxygen therapy reduces discomfort during hypoxemic respiratory failure. *Respir Care.* 2012;57(10):1571-1577.

7. Thille AW, Muller G, Gacouin A, et al. Effect of Postextubation High-Flow Nasal Oxygen With Noninvasive Ventilation vs High-Flow Nasal Oxygen Alone on Reintubation Among Patients at High Risk of Extubation Failure: A Randomized Clinical Trial. *JAMA.* 2019;322(15):1465-1475.

8. Gaspari R, Spinazzola G, Ferrone G, et al. High-Flow Nasal Cannula Versus Standard Oxygen Therapy After Extubation in Liver Transplantation: A Matched Controlled Study. *Respir Care.* 2020;65(1):21-28.

9. Di Mussi R, Spadaro S, Stripoli T, et al. High-flow nasal cannula oxygen therapy decreases postextubation neuroventilatory drive and work of breathing in patients with chronic obstructive pulmonary disease. *Crit Care.* 2018;22(1):180.

10. Song HZ, Gu JX, Xiu HQ, Cui W, Zhang GS. The value of high-flow nasal cannula oxygen therapy after extubation in patients with acute respiratory failure. *Clinics (Sao Paulo).* 2017;72(9):562-567.

11. Hernandez G, Vaquero C, Colinas L, et al. Effect of Postextubation High-Flow Nasal Cannula vs Noninvasive Ventilation on Reintubation and Postextubation Respiratory Failure in High-Risk Patients: A Randomized Clinical Trial. *JAMA.* 2016;316(15):1565-1574.

12. Hernandez G, Vaquero C, Gonzalez P, et al. Effect of Postextubation High-Flow Nasal Cannula vs Conventional Oxygen Therapy on Reintubation in Low-Risk Patients: A Randomized Clinical Trial. *JAMA.* 2016;315(13):1354-1361.

13. Maggiore SM, Idone FA, Vaschetto R, et al. Nasal high-flow versus Venturi mask oxygen therapy after extubation. Effects on oxygenation, comfort, and clinical outcome. *Am J Respir Crit Care Med.* 2014;190(3):282-288.

14. Rittayamai N, Tscheikuna J, Rujiwit P. High-flow nasal cannula versus conventional oxygen therapy after endotracheal extubation: a randomized crossover physiologic study. *Respir Care.* 2014;59(4):485-490.

15. Vourc'h M, Nicolet J, Volteau C, et al. High-Flow Therapy by Nasal Cannulae Versus High-Flow Face Mask in Severe Hypoxemia After Cardiac Surgery: A Single-Center Randomized Controlled Study-The HEART FLOW Study. *J Cardiothorac Vasc Anesth.* 2020;34(1):157-165.

16. Tatsuishi W, Sato T, Kataoka G, Sato A, Asano R, Nakano K. High-Flow Nasal Cannula Therapy With Early Extubation for Subjects Undergoing Off-Pump Coronary Artery Bypass Graft Surgery. *Respir Care.* 2020;65(2):183-190.

17. Pennisi MA, Bello G, Congedo MT, et al. Early nasal high-flow versus Venturi mask oxygen therapy after lung resection: a randomized trial. *Crit Care.* 2019;23(1):68.

18. Sahin M, El H, Akkoc I. Comparison of Mask Oxygen Therapy and High-Flow Oxygen Therapy after Cardiopulmonary Bypass in Obese Patients. *Can Respir J.* 2018;2018:1039635.

19. Zochios V, Collier T, Blaudszun G, et al. The effect of high-flow nasal oxygen on hospital length of stay in cardiac surgical patients at high risk for respiratory complications: a randomised controlled trial. *Anaesthesia.* 2018;73(12):1478-1488.

20. Brainard J, Scott BK, Sullivan BL, et al. Heated humidified high-flow nasal cannula oxygen after thoracic surgery - A randomized prospective clinical pilot trial. *J Crit Care.* 2017;40:225-228.

21. Yu Y, Qian X, Liu C, Zhu C. Effect of High-Flow Nasal Cannula versus Conventional Oxygen Therapy for Patients with Thoracoscopic Lobectomy after Extubation. *Can Respir J.* 2017;2017:7894631.

22. Futier E, Paugam-Burtz C, Godet T, et al. Effect of early postextubation high-flow nasal cannula vs conventional oxygen therapy on hypoxaemia in patients after major abdominal surgery: a French multicentre randomised controlled trial (OPERA). *Intensive Care Med.* 2016;42(12):1888-1898.

23. Ansari BM, Hogan MP, Collier TJ, et al. A Randomized Controlled Trial of High-Flow Nasal Oxygen (Optiflow) as Part of an Enhanced Recovery Program After Lung Resection Surgery. *Ann Thorac Surg.* 2016;101(2):459-464.

24. Corley A, Bull T, Spooner AJ, Barnett AG, Fraser JF. Direct extubation onto high-flow nasal cannulae post-cardiac surgery versus standard treatment in patients with a BMI >/=30: a randomised controlled trial. *Intensive Care Med.* 2015;41(5):887-894.

25. Parke R, McGuinness S, Dixon R, Jull A. Open-label, phase II study of routine high-flow nasal oxygen therapy in cardiac surgical patients. *Br J Anaesth.* 2013;111(6):925-931.

26. Guitton C, Ehrmann S, Volteau C, et al. Nasal high-flow preoxygenation for endotracheal intubation in the critically ill patient: a randomized clinical trial. *Intensive Care Med.* 2019;45(4):447-458.

27. Vourc'h M, Baud G, Feuillet F, et al. High-flow Nasal Cannulae Versus Non-invasive Ventilation for Preoxygenation of Obese Patients: The PREOPTIPOP Randomized Trial. *EClinicalMedicine.* 2019;13:112-119.

28. Frat JP, Ricard JD, Quenot JP, et al. Non-invasive ventilation versus high-flow nasal cannula oxygen therapy with apnoeic oxygenation for preoxygenation before intubation of patients with acute hypoxaemic respiratory failure: a randomised, multicentre, open-label trial. *Lancet Respir Med.* 2019;7(4):303-312.

29. Simon M, Wachs C, Braune S, de Heer G, Frings D, Kluge S. High-Flow Nasal Cannula Versus Bag-Valve-Mask for Preoxygenation Before Intubation in Subjects With Hypoxemic Respiratory Failure. *Respir Care.* 2016;61(9):1160-1167.

30. Jaber S, Monnin M, Girard M, et al. Apnoeic oxygenation via high-flow nasal cannula oxygen combined with non-invasive ventilation preoxygenation for intubation in hypoxaemic patients in the intensive care unit: the single-centre, blinded, randomised controlled OPTINIV trial. *Intensive Care Med.* 2016;42(12):1877-1887.

31. Vourc'h M, Asfar P, Volteau C, et al. High-flow nasal cannula oxygen during endotracheal intubation in hypoxemic patients: a randomized controlled clinical trial. *Intensive Care Med.* 2015;41(9):1538-1548.

32. Saksitthichok B, Petnak T, So-Ngern A, Boonsarngsuk V. A prospective randomized comparative study of high-flow nasal cannula oxygen and non-invasive ventilation in hypoxemic patients undergoing diagnostic flexible bronchoscopy. *J Thorac Dis.* 2019;11(5):1929-1939.

33. Douglas N, Ng I, Nazeem F, et al. A randomised controlled trial comparing high-flow nasal oxygen with standard management for conscious sedation during bronchoscopy. *Anaesthesia.* 2018;73(2):169-176.

34. Simon M, Braune S, Frings D, Wiontzek AK, Klose H, Kluge S. High-flow nasal cannula oxygen versus non-invasive ventilation in patients with acute hypoxaemic respiratory failure undergoing flexible bronchoscopy--a prospective randomised trial. *Crit Care.* 2014;18(6):712.

35. Braunlich J, Dellweg D, Bastian A, et al. Nasal high-flow versus noninvasive ventilation in patients with chronic hypercapnic COPD. *Int J Chron Obstruct Pulmon Dis.* 2019;14:1411-1421.

36. McKinstry S, Pilcher J, Bardsley G, et al. Nasal high flow therapy and PtCO2 in stable COPD: A randomized controlled cross-over trial. *Respirology.* 2018;23(4):378-384.

37. Storgaard LH, Hockey HU, Laursen BS, Weinreich UM. Long-term effects of oxygen-enriched high-flow nasal cannula treatment in COPD patients with chronic hypoxemic respiratory failure. *Int J Chron Obstruct Pulmon Dis.* 2018;13:1195-1205.

38. Fraser JF, Spooner AJ, Dunster KR, et al. Nasal high flow oxygen therapy in patients with COPD reduces respiratory rate and tissue carbon dioxide while increasing tidal and end-expiratory lung volumes: a randomised crossover trial. *Thorax.* 2016;71(8):759-761.

39. Tan D, Walline JH, Ling B, et al. High-flow nasal cannula oxygen therapy versus non-invasive ventilation for chronic obstructive pulmonary disease patients after extubation: a multicenter, randomized controlled trial. *Crit Care* 2020; 24(1):489.

40. Jing G, Li J, Hao D, et al. Comparison of high flow nasal cannula with noninvasive ventilation in chronic obstructive pulmonary disease patients with hypercapnia in preventing postextubation respiratory failure: A pilot randomized controlled trial. *Res Nurs Health.* 2019; 42(3):217-225.

41. Li XY, Tang X, Wang R, et al. High-flow nasal cannula for chronic obstructive pulmonary disease with acute compensated hypercapnic respiratory failure: A randomized, controlled trial. *Int J Chron Obstruct Pulmon Dis* 2020; 15:3051-3061.

42. Longhini F, Pisani L, Lungu R, et al. High-flow oxygen therapy after noninvasive ventilation interruption in patients recovering from hypercapnic acute respiratory failure: A physiological crossover trial. *Crit Care Med.* 2019; 47(6):e506-e511.

43. McKinstry S, Singer J, Baarsma JP, Weatherall M, Beasley R, Fingleton J. Nasal high-flow therapy compared with non-invasive ventilation in COPD patients with chronic respiratory failure: A randomized controlled cross-over trial. *Respirology.* 2019; 24(11):1081-1087.

44. Sun J, Li Y, Ling B, et al. High flow nasal cannula oxygen therapy versus non-invasive ventilation for chronic obstructive pulmonary disease with acute-moderate hypercapnic respiratory failure: an observational cohort study. *Int J Chron Obstruct Pulmon Dis.* 2019; 14:1229-1237.

45. Lee MK, Choi J, Park B, et al. High flow nasal cannulae oxygen therapy in acute-moderate hypercapnic respiratory failure. *Clin Respir J* 2018; 12(6):2046-2056.
